# Supplementary material for: Characterization of Flours From by-products of Tropical Fruit and Their Incorporation Into Functional Cheeses
Source: Research Square preprint supplement (doi:10.21203/rs.3.rs-5722448/v1), 2024-12-30
Supplement: Supplementary file 1 [file dfc36f856b968d93e8a8041e.docx]

Highlights:

- Fruits by-products can be transformed into vegetable flours;
- Pineapple and acerola flours presented good quality as food additives;
- Functional properties were achieved in cheeses enriched with these flours.
